# Supplementary material for: Molecular Dynamics Simulation Studies on the Aggregation of Amyloid-β Peptides and Their Disaggregation by Ultrasonic Wave and Infrared Laser Irradiation
Source: MDPI journal article supplement (doi:10.3390/molecules27082483), 2022-04-12
Supplement: s1 [file s1]

## Supplementary Material

### Molecular Dynamics Simulation Studies on the Aggregation of Amyloid- $\beta$ Peptides and Their Disaggregation by Ultrasonic Wave and Infrared Laser Irradiation

Hisashi Okumura <sup>1,2,3,\*</sup> and Satoru G. Itoh <sup>1,2,3</sup>

<sup>1</sup> Exploratory Research Center on Life and Living Systems, National Institutes of Natural Sciences, Okazaki 444-8787, Aichi, Japan; itoh@ims.ac.jp

<sup>2</sup> Institute for Molecular Science, National Institutes of Natural Sciences, Okazaki 444-8787, Aichi, Japan

<sup>3</sup> Department of Structural Molecular Science, SOKENDAI (The Graduate University for Advanced Studies), Okazaki 444-8787, Aichi, Japan

\* Correspondence: hokumura@ims.ac.jp

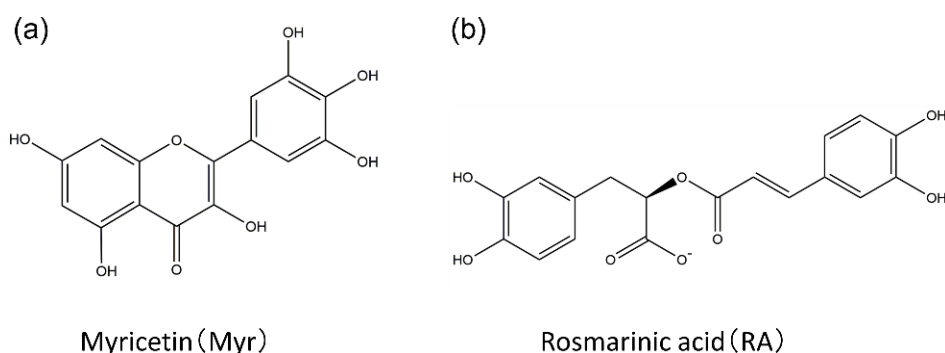

**Figure S1.** The chemical structures of (a) myricetin (Myr) and (b) rosmarinic acid (RA). Reprinted with permission from Ref. [1]. Copyright 2020 Elsevier.

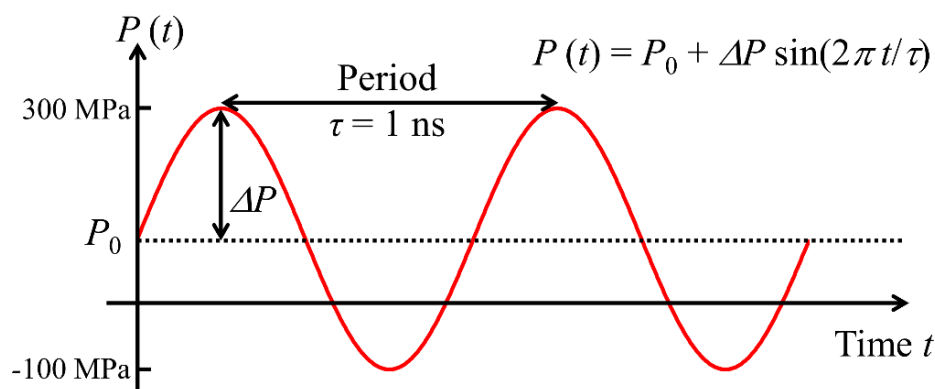

**Figure S2.** Time series of the set pressure, which varies sinusoidally. Reprinted with permission from Ref. [2]. Copyright 2014 American Chemical Society.

#### References

1. Ngoc, L.L.N.; Itoh, S.G.; Sompornpisut, P.; Okumura, H. Replica-permutation molecular dynamics simulations of an amyloid- $\beta$ (16–22) peptide and polyphenols. *Chem. Phys. Lett.* **2020**, *758*, 137913.
2. Okumura, H.; Itoh, S.G. Amyloid Fibril Disruption by Ultrasonic Cavitation: Nonequilibrium Molecular Dynamics Simulations. *J. Am. Chem. Soc.* **2014**, *136*, 10549–10552.
